# Supplementary material for: Role of the GRAS transcription factor ATA/RAM1 in the transcriptional reprogramming of arbuscular mycorrhiza in Petunia hybrida
Source: PubMed Central journal article supplement (PMC5549340; doi:10.1186/s12864-017-3988-8), 2017-08-08
Supplement: 12864_2017_3988_MOESM1_ESM.pdf [file 12864_2017_3988_MOESM1_ESM.pdf]

## Additional File 1: General information on RNAseq experiment

|                      | wt         |               | <i>ram1</i> |               |
|----------------------|------------|---------------|-------------|---------------|
|                      | NM         | M             | NM          | M             |
| Mean number of reads | 18 515 472 | 18 789 580    | 19 718 736  | 19 010 779    |
| % fungal reads       | N.A        | 6.360 ± 0.020 | N.A         | 2.557 ± 0.003 |
| % colonisation       | N.A        | 20 ± 5 %      | N.A         | 15 ± 8 %      |
