# Supplementary material for: Role of the GRAS transcription factor ATA/RAM1 in the transcriptional reprogramming of arbuscular mycorrhiza in Petunia hybrida
Source: PubMed Central journal article supplement (PMC5549340; doi:10.1186/s12864-017-3988-8), 2017-08-08
Supplement: 12864_2017_3988_MOESM2_ESM.pdf [file 12864_2017_3988_MOESM2_ESM.pdf]

## Additional File 2: Number of genes per conditions

|                              |       |             |
|------------------------------|-------|-------------|
| Total genes                  | 32928 |             |
| expressed in roots           | 22954 |             |
|                              | wt    | <i>ram1</i> |
| induced $\geq 2$             | 1321  | 475         |
| induced $\geq 5$             | 650   | 201         |
| repressed $\leq 2$           | 797   | 717         |
| repressed $\leq 5$           | 91    | 51          |
| significantly regulated      | 7050  | 3992        |
| induced $\geq 5$ AM-specific | 430   | 151         |
