# Supplementary material for: Role of the GRAS transcription factor ATA/RAM1 in the transcriptional reprogramming of arbuscular mycorrhiza in Petunia hybrida
Source: PubMed Central journal article supplement (PMC5549340; doi:10.1186/s12864-017-3988-8), 2017-08-08
Supplement: 12864_2017_3988_MOESM5_ESM.pdf [file 12864_2017_3988_MOESM5_ESM.pdf]

# Additional File 5: Genes induced at least 5-fold in the wild type and their expression in *ram1*

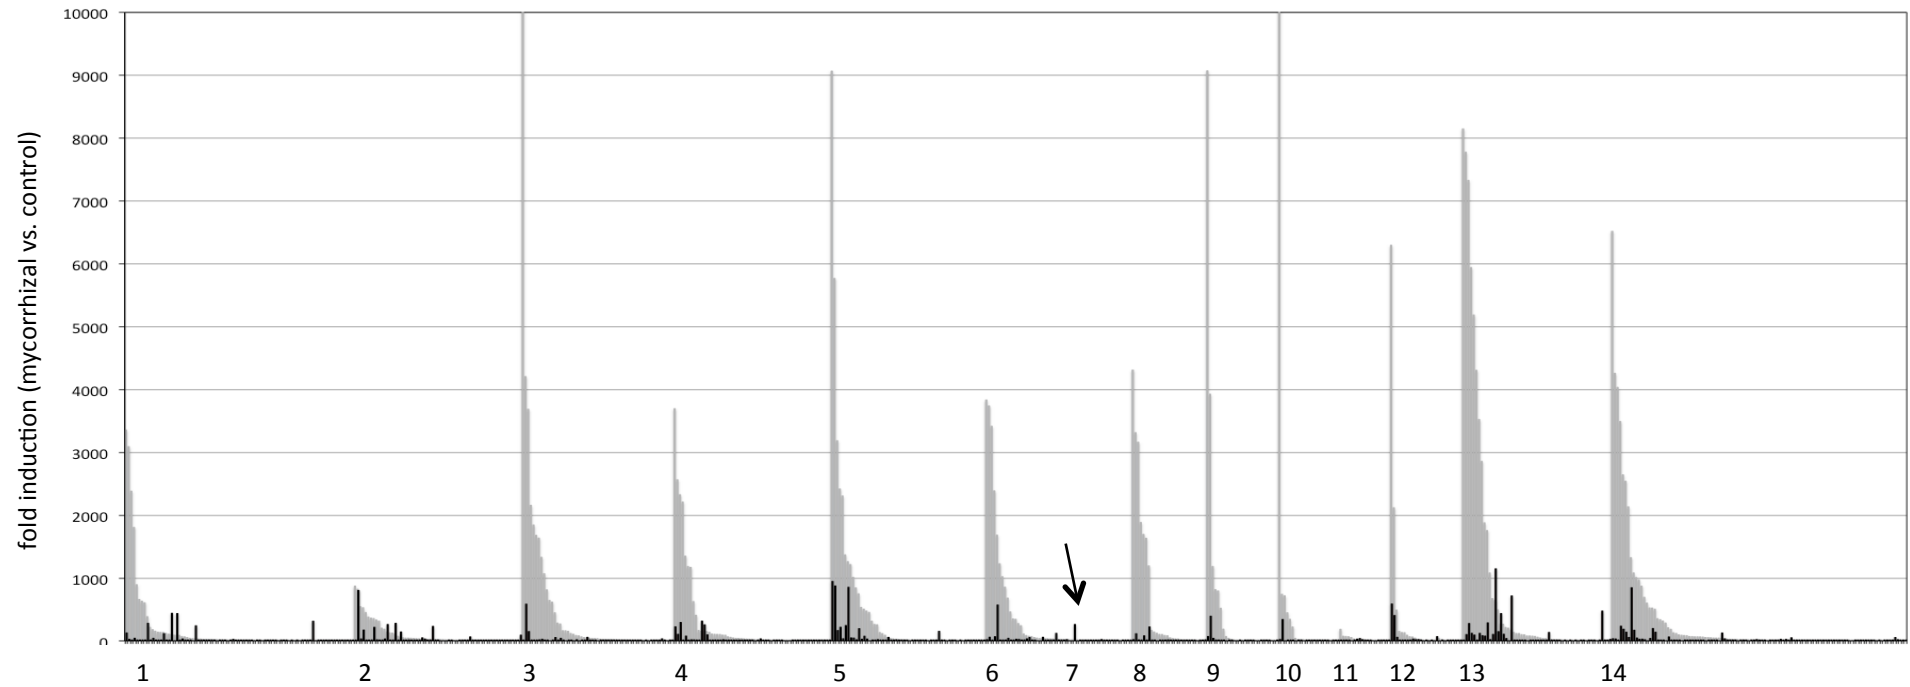

1: Metabolic process

2: Transcription

3: Protein metabolism

4: Transport

5: Secondary metabolism

6: Signaling

7: Carbohydrate metabolism

8: Lipid metabolism

9: Cell wall

10: Cellular process

11: Defense / stress

12: Primary metabolism

13: Uncategorized

14: Unknown
