# Supplementary material for: Role of the GRAS transcription factor ATA/RAM1 in the transcriptional reprogramming of arbuscular mycorrhiza in Petunia hybrida
Source: PubMed Central journal article supplement (PMC5549340; doi:10.1186/s12864-017-3988-8), 2017-08-08
Supplement: 12864_2017_3988_MOESM7_ESM.pdf [file 12864_2017_3988_MOESM7_ESM.pdf]

## Additional File 7: Transcription factors induced in mycorrhizal roots

|              | Total       | induced in WT | Induced in <i>ram1</i> | Xue et al. 2015 |
|--------------|-------------|---------------|------------------------|-----------------|
| <b>Total</b> | <b>1610</b> | <b>53</b>     | <b>17</b>              | <b>45</b>       |
| GRAS         | 78          | 19            | 7                      | 18              |
| AP2/ERF      | 156         | 9             | 6                      | 8               |
| MYB          | 468         | 4             | 0                      | 3               |
| NAC          | 135         | 4             | 1                      | 4               |
| MADS         | 128         | 3             | 0                      | 2               |
| C2H2         | 71          | 3             | 2                      | 5               |
| bHLH         | 182         | 1             | 0                      | NA              |
| B3           | 82          | 1             | 1                      | NA              |
| bZIP         | 80          | 1             | 0                      | 1               |
| DOF          | 35          | 1             | 0                      | NA              |
| jumonji      | 24          | 1             | 0                      | NA              |
| WRKY         | 86          | 0             | 0                      | 1               |
| ARF          | 25          | 0             | 0                      | 1               |
| LOB          | 60          | 0             | 0                      | 1               |
| NIN          | NA          | NA            | NA                     | 1               |
