# Supplementary material for: Role of the GRAS transcription factor ATA/RAM1 in the transcriptional reprogramming of arbuscular mycorrhiza in Petunia hybrida
Source: PubMed Central journal article supplement (PMC5549340; doi:10.1186/s12864-017-3988-8), 2017-08-08
Supplement: 12864_2017_3988_MOESM8_ESM.pdf [file 12864_2017_3988_MOESM8_ESM.pdf]

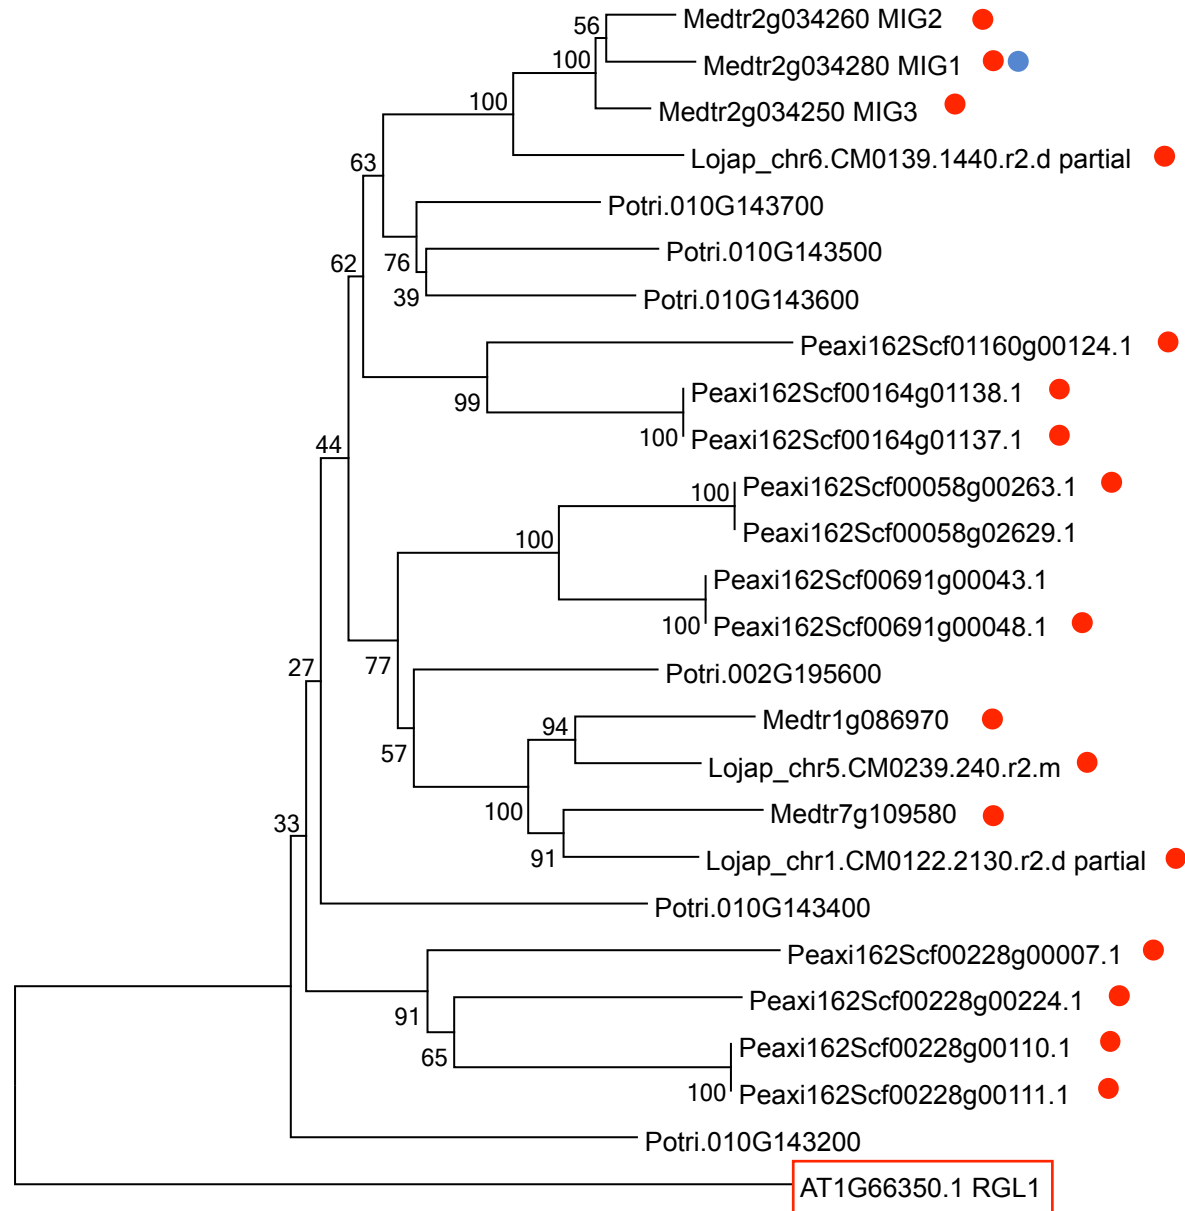

0.2
